# Supplementary material for: Tin nanoparticles embedded in an N-doped microporous carbon matrix derived from ZIF-8 as an anode for ultralong-life and ultrahigh-rate lithium-ion batteries
Source: Royal Society of Chemistry journal article supplement (doi:10.1039/c9qi00219g), 2019-01-01
Supplement: c9qi00219g1.pdf [file c9qi00219g1.pdf]

## Supporting Information

### **Tin Nanoparticles Embedded in N-Doped Microporous Carbon Matrix Deriving from ZIF-8 as Anode for Ultralong-life and Ultrahigh-rate Lithium-Ion Batteries**

Qingqing Han,<sup>a</sup> Ting Jin,<sup>a</sup> Yang Li,<sup>a</sup> Yuchang Si,<sup>\*b</sup> Haixia Li,<sup>\*a</sup> Yijing Wang<sup>a</sup> and Lifang Jiao<sup>\*a</sup>

<sup>a</sup>Key Laboratory of Advanced Energy Materials Chemistry (Ministry of Education),  
College of Chemistry, Nankai University, Tianjin 300071, China.

E-mail: [jiaolf@nankai.edu.cn](mailto:jiaolf@nankai.edu.cn).

<sup>b</sup>Logistics University of People's Armed Police Force

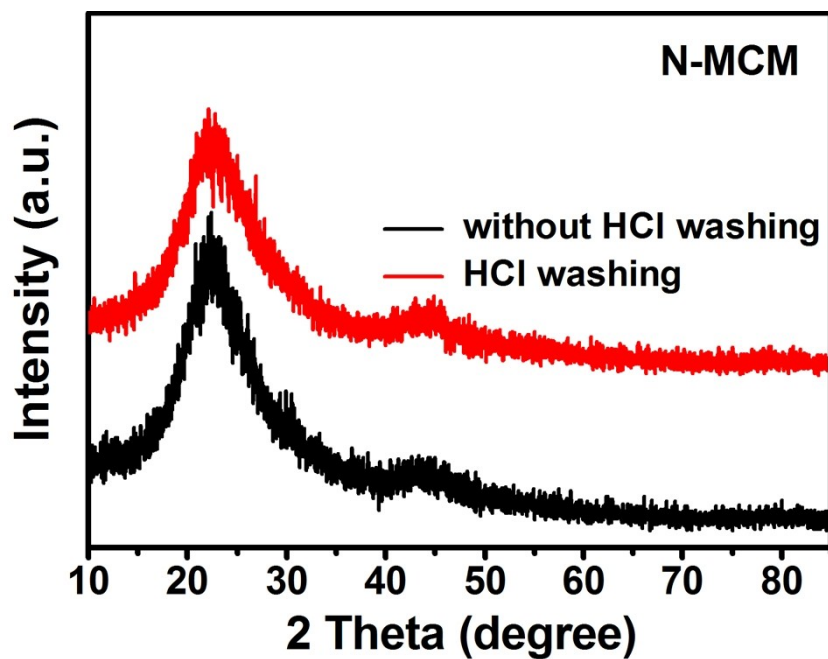

**Fig. S1.** XRD patterns of nitrogen-doped microporous carbon matrix (N-MCM) before and after treated with HCl.

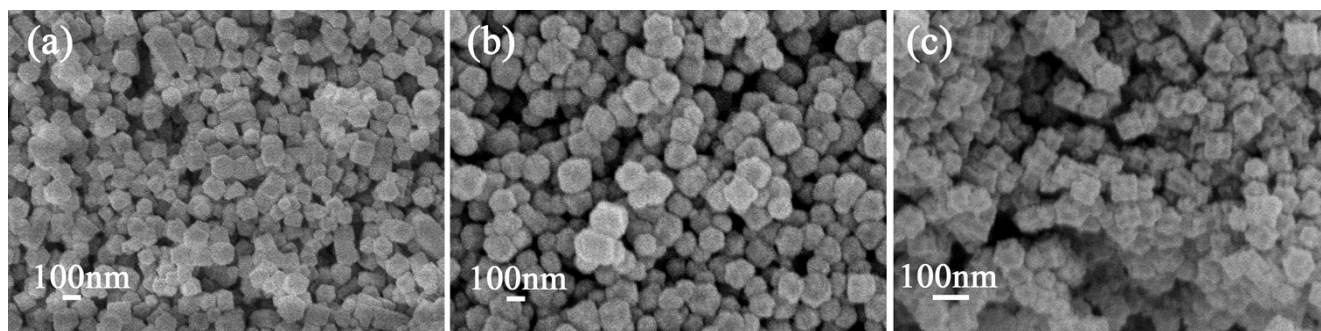

**Fig. S2.** SEM images of (a) ZIF-8, (b) nitrogen-doped microporous carbon matrix (N-MCM) and (c) Sn@N-MCM obtained at 600 °C.

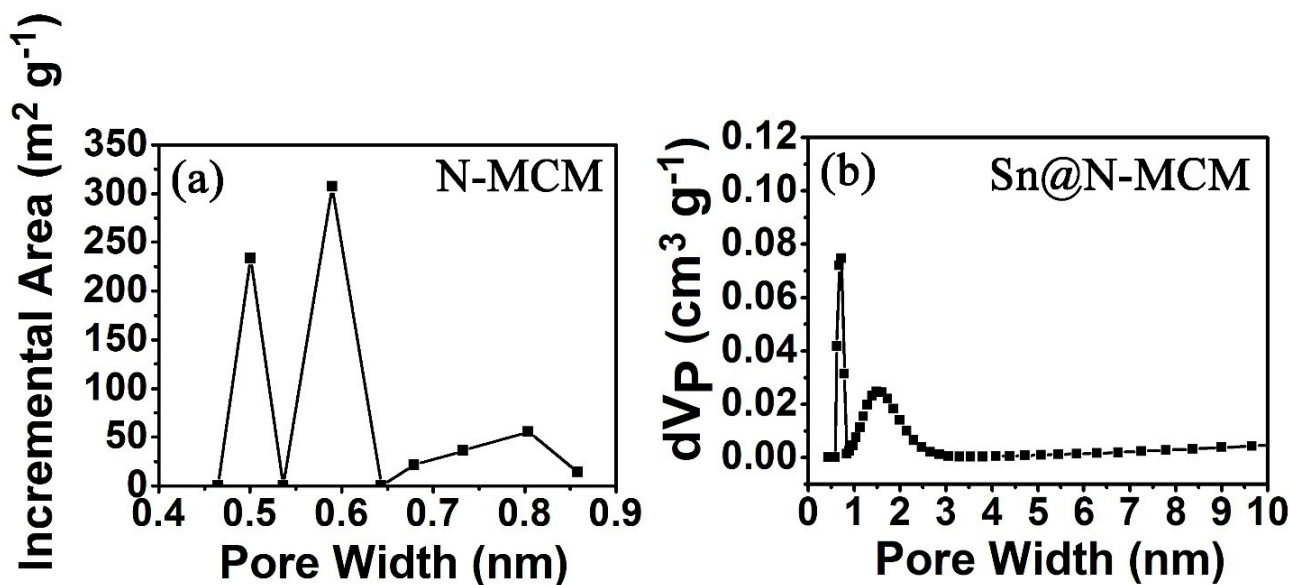

Fig. S3. Pore size distribution curves of (a) N-MCM and (b) Sn@N-MCM.

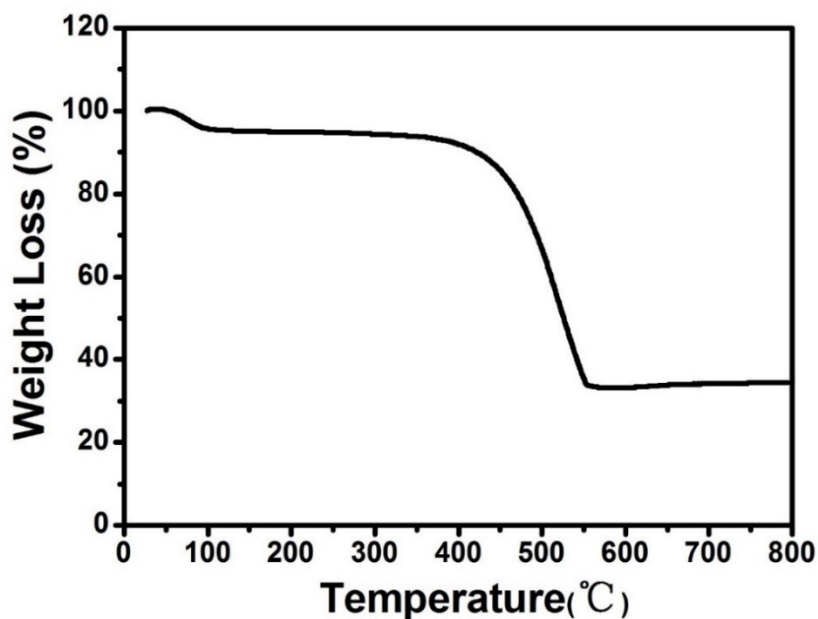

Fig. S4. TGA curve of Sn@N-MCM in air with a heating rate of  $5\text{ }^{\circ}\text{C min}^{-1}$ .

The decline of the curve below  $100\text{ }^{\circ}\text{C}$  can be attributed to the loss of moisture in the sample. The fast weight loss occurred between  $350\text{ }^{\circ}\text{C}$  and  $550\text{ }^{\circ}\text{C}$ , which is ascribed to the carbon combustion ( $\text{C} + \text{O}_2 \rightarrow \text{CO}_2$  (gas)). The Sn content was calculated following equation (1):

$$\text{Sn (wt\%)} = 100 \times \frac{\text{molecular weight of Sn}}{\text{molecular weight of SnO}_2} \times \frac{\text{final weight}}{\text{initial weight}} \quad (1)$$

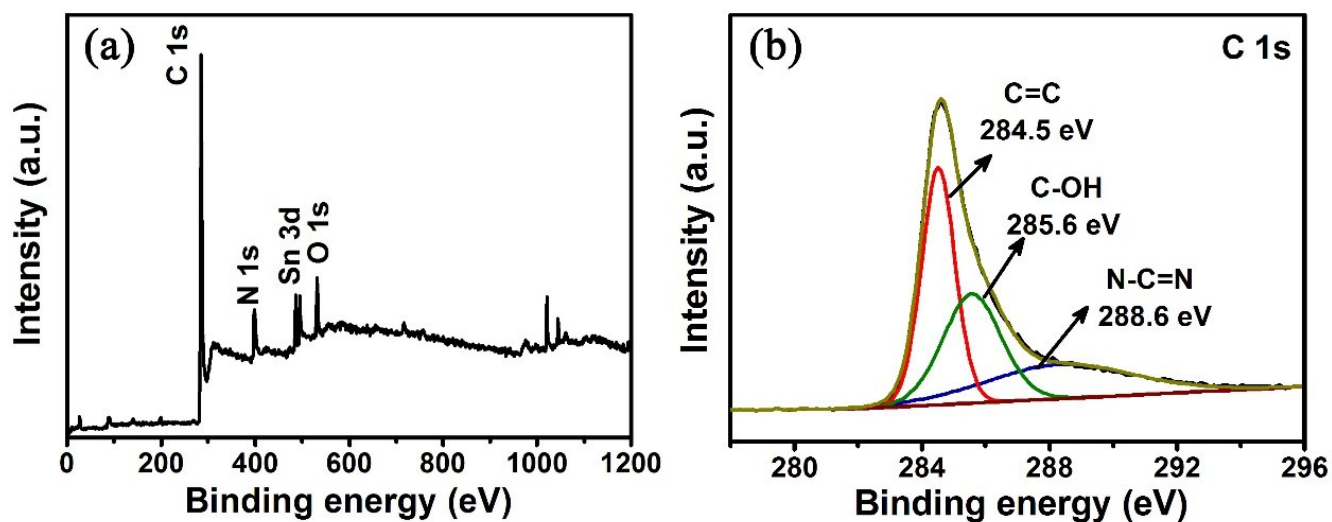

Fig. S5. XPS spectra of Sn@N-MCM (a) Full spectrum and (b) high resolution C 1s spectrum.

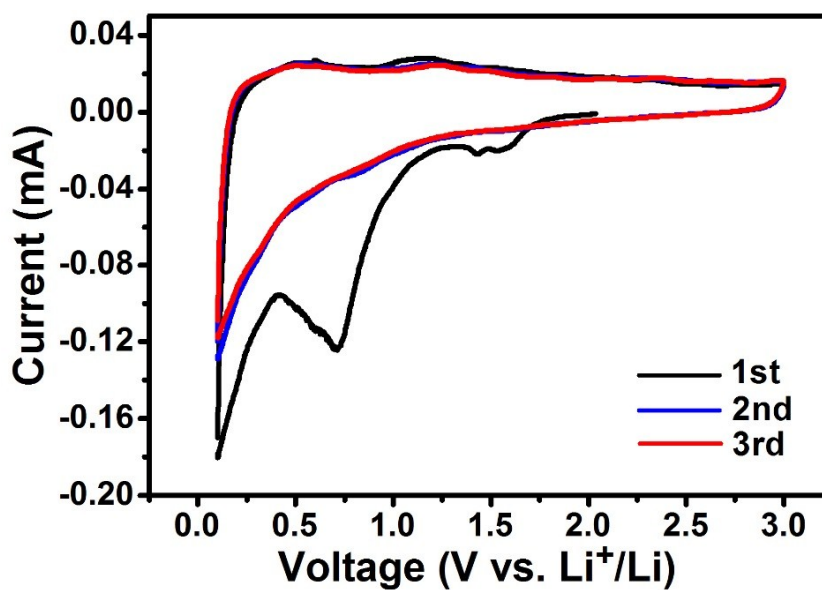

Fig. S6. Cyclic voltammetry curves of Sn@N-MCM scanned at a rate of 0.1 mV s<sup>-1</sup>.

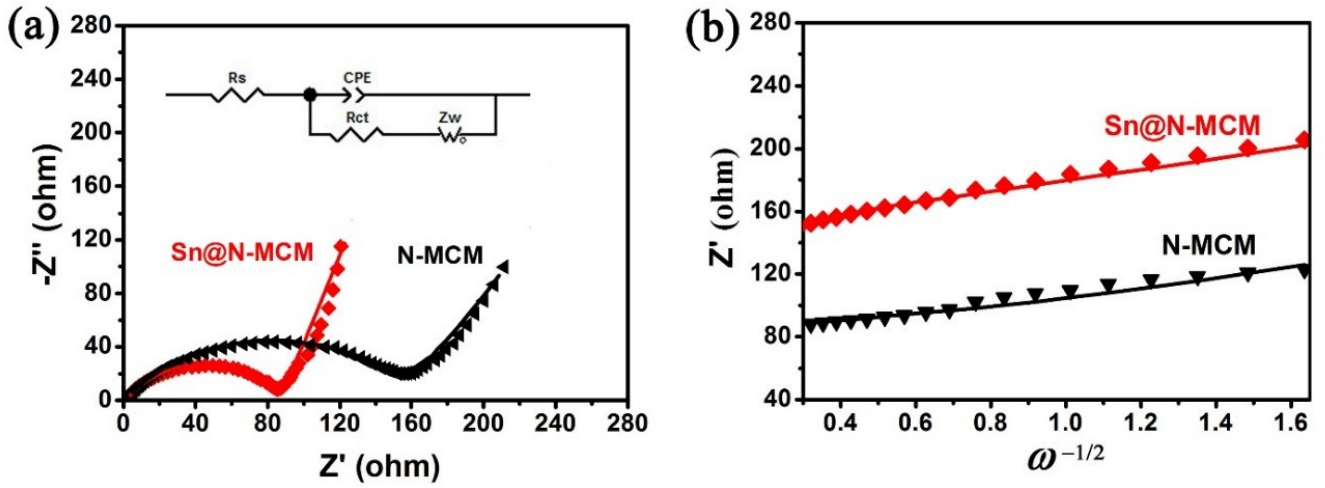

**Fig. S7.** (a) Nyquist plots of Sn@N-MCM and N-MCM electrodes and the corresponding simulated curves based on the equivalent circuit (inset). (b) Real parts of the impedance ( $Z'$ ) versus the reciprocal square root of the angular frequency ( $\omega$ ) in the low frequency region of the above Sn@N-MCM and N-MCM.

In this equivalent circuit, charge-transfer resistance ( $R_{ct}$ ) is related to ability of charges transferring at electrode/electrolyte interfaces. Warburg impedance ( $Z_w$ ) is associated with  $\text{Li}^+$  ions diffusion in the Sn@N-MCM. In addition,  $R_s$  stands for the solution resistance and constant-phase element (CPE) represents the double-layer capacitance.

The slope in equation (2) is Warburg factor ( $\sigma$ ), which is an important parameter to calculate  $\text{Li}^+$  diffusion coefficient ( $D_{\text{Li}}$ ) using the equation (3):

$$Z' = R_D + R_L + \sigma \omega^{-1/2} \quad (2)$$

$$D_{\text{Li}} = \frac{R^2 T^2}{2A^2 n^4 F^4 C^2 \sigma^2} \quad (3)$$

Where  $R$  is the gas constant,  $T$  is the absolute temperature,  $A$  is the surface area of electrode,  $n$  is the number of electrons per molecule during oxidization,  $F$  is the Faraday constant,  $C$  is the concentration of lithium ions.

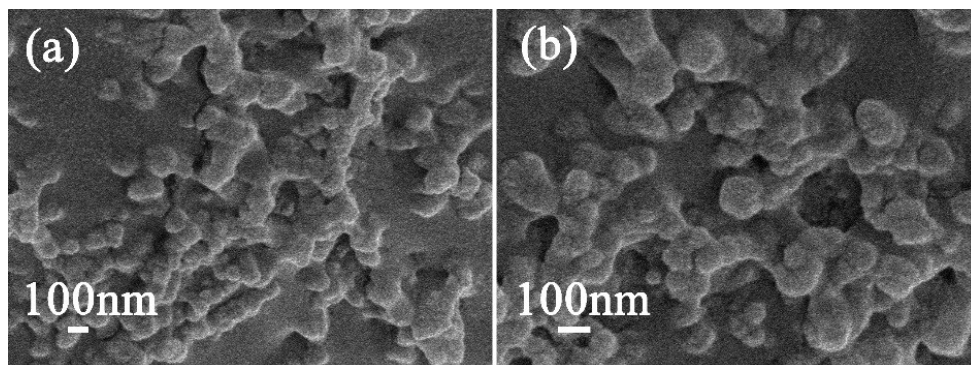

**Fig. S8.** SEM images of Sn@N-MCM electrode after 100 cycles at different magnifications.

**Table S1.** The content ratio of three N species in Sn@N-MCM.

| N types            | pyridinic N | pyrrolic N | graphitic N |
|--------------------|-------------|------------|-------------|
| <b>Percentages</b> | 41.60%      | 43.84%     | 14.56%      |

**Table S2.** Impedence parameters fitted from the equivalent circuit.

| Samples         | $R_s(\Omega)$ | $R_{ct}(\Omega)$ | $\sigma$ |
|-----------------|---------------|------------------|----------|
| <b>Sn@N-MCM</b> | 1.71          | 86.29            | 27.57    |
| <b>N-MCM</b>    | 1.11          | 161.20           | 39.60    |

**Table S3.** Comparison of the as-prepared Sn@N-MCM with previously reported Sn-based anodes for LIBs.

| Samples         | Sn (wt%) | Rate capability                                                                                                                                                | Cyclic stability                                         | Ref.      |
|-----------------|----------|----------------------------------------------------------------------------------------------------------------------------------------------------------------|----------------------------------------------------------|-----------|
| Sn@N-MCM        | 28.7%    | 763.5 mA h g <sup>-1</sup> at 0.5 A g <sup>-1</sup><br>470.0 mA h g <sup>-1</sup> at 4 A g <sup>-1</sup><br>225.5 mA h g <sup>-1</sup> at 20 A g <sup>-1</sup> | 4 A g <sup>-1</sup> /471 mA h g <sup>-1</sup> /2500 th   | This work |
| Sn@3D-NPC       | 31.0%    | 641 mA h g <sup>-1</sup> at 0.5 A g <sup>-1</sup><br>562 mA h g <sup>-1</sup> at 1 A g <sup>-1</sup><br>302 mA h g <sup>-1</sup> at 5 A g <sup>-1</sup>        | 0.2 A g <sup>-1</sup> /742 mA h g <sup>-1</sup> /200 th  | 1         |
| Sn/C hybrid     | 82.3%    | 807 mA h g <sup>-1</sup> at 0.4 A g <sup>-1</sup><br>461 mA h g <sup>-1</sup> at 2 A g <sup>-1</sup>                                                           | 1 A g <sup>-1</sup> /690 mA h g <sup>-1</sup> /150 th    | 2         |
| yolk-shell Sn@C | 70.0%    | 720 mA h g <sup>-1</sup> at 0.5 A g <sup>-1</sup><br>580 mA h g <sup>-1</sup> at 1 A g <sup>-1</sup><br>350 mA h g <sup>-1</sup> at 5 A g <sup>-1</sup>        | 0.2 A g <sup>-1</sup> /810 mA h g <sup>-1</sup> /500 th  | 3         |
| Sn/CNT          | 67.3%    | 831 mA h g <sup>-1</sup> at 0.5 A g <sup>-1</sup><br>746 mA h g <sup>-1</sup> at 1 A g <sup>-1</sup><br>377 mA h g <sup>-1</sup> at 5 A g <sup>-1</sup>        | 0.2 A g <sup>-1</sup> /749 mA h g <sup>-1</sup> /100 th  | 4         |
| Sn@HC           | 68.1%    | 743 mA h g <sup>-1</sup> at 0.5 A g <sup>-1</sup><br>450 mA h g <sup>-1</sup> at 4 A g <sup>-1</sup><br>275 mA h g <sup>-1</sup> at 20 A g <sup>-1</sup>       | 4 A g <sup>-1</sup> /423 mA h g <sup>-1</sup> /6000 th   | 5         |
| Sn@NC           | 59.0%    | 1070 mA h g <sup>-1</sup> at 0.2 A g <sup>-1</sup><br>623 mA h g <sup>-1</sup> at 1 A g <sup>-1</sup><br>500 mA h g <sup>-1</sup> at 5 A g <sup>-1</sup>       | 0.25 A g <sup>-1</sup> /710 mA h g <sup>-1</sup> /130 th | 6         |
| Sn@FLCNFs       | 45.9%    | 846 mA h g <sup>-1</sup> at 0.2 A g <sup>-1</sup><br>656 mA h g <sup>-1</sup> at 1 A g <sup>-1</sup>                                                           | 1 A g <sup>-1</sup> /656 mA h g <sup>-1</sup> /300 th    | 7         |
| Sn@C            | 45.7%    | 672 mA h g <sup>-1</sup> at 0.2 A g <sup>-1</sup><br>205 mA h g <sup>-1</sup> at 16 A g <sup>-1</sup>                                                          | 4 A g <sup>-1</sup> /410 mA h g <sup>-1</sup> /4000 th   | 8         |
| Sn@C            | 63.0%    | 778 mA h g <sup>-1</sup> at 0.5 A g <sup>-1</sup><br>336 mA h g <sup>-1</sup> at 8 A g <sup>-1</sup>                                                           | 1 A g <sup>-1</sup> /691 mA h g <sup>-1</sup> /500 th    | 9         |
| Sn/C            | 53.2%    | 610.8 mA h g <sup>-1</sup> at 0.6 A g <sup>-1</sup><br>341.6 mA h g <sup>-1</sup> at 6 A g <sup>-1</sup>                                                       | 3 A g <sup>-1</sup> /537 mA h g <sup>-1</sup> /1000 th   | 10        |

## Supplemental References

- 1 Y. Guo, X. Zeng, Y. Zhang, Z. Dai, H. Fan, Y. Huang, W. Zhang, H. Zhang, J. Lu, F. Huo and Q. Yan, *ACS Appl. Mater. Interfaces*, 2017, **9**, 17172-17177.
- 2 F. Cheng, W.-C. Li, J.-N. Zhu, W.-P. Zhang and A.-H. Lu, *Nano Energy*, 2016, **19**, 486-494.
- 3 H. Zhang, X. Huang, O. Noonan, L. Zhou and C. Yu, *Adv. Funct. Mater.*, 2017, **27**, 1606023.
- 4 X. Zhou, L. Yu, X.-Y. Yu and X. W. Lou, *Adv. Energy Mater.*, 2016, **6**, 1601177.
- 5 N. Zhang, Y. Wang, M. Jia, Y. Liu, J. Xu, L. Jiao and F. Cheng, *Chem. Commun.*, 2018, **54**, 1205-1208.
- 6 C. Guo, Q. Yang, J. Liang, L. Wang, Y. Zhu and Y. Qian, *Mater. Lett.*, 2016, **184**, 332-335.
- 7 L. Qiao, L. Qiao, X. Li, X. Sun, H. Yue and D. He, *J. Mol. Sci.*, 2017, **52**, 6969-6975.
- 8 N. Zhang, Q. Zhao, X. Han, J. Yang and J. Chen, *Nanoscale*, 2014, **6**, 2827-2832.
- 9 Y. J. Hong and Y. C. Kang, *Small*, 2015, **11**, 2157-2163.
- 10 X. Huang, S. Cui, J. Chang, P. B. Hallac, C. R. Fell, Y. Luo, B. Metz, J. Jiang, P. T. Hurley and J. Chen, *Angew. Chem., Int. Ed.*, 2015, **54**, 1490-1493.
